# Supplementary material for: Revisiting the Phylogenetic History of Helminths Through Genomics, the Case of the New Echinococcus oligarthrus Genome
Source: PubMed Central journal article supplement (PMC6692484; doi:10.3389/fgene.2019.00708), 2019-08-07
Supplement: DataSheet_2.pdf [file DataSheet_2.pdf]

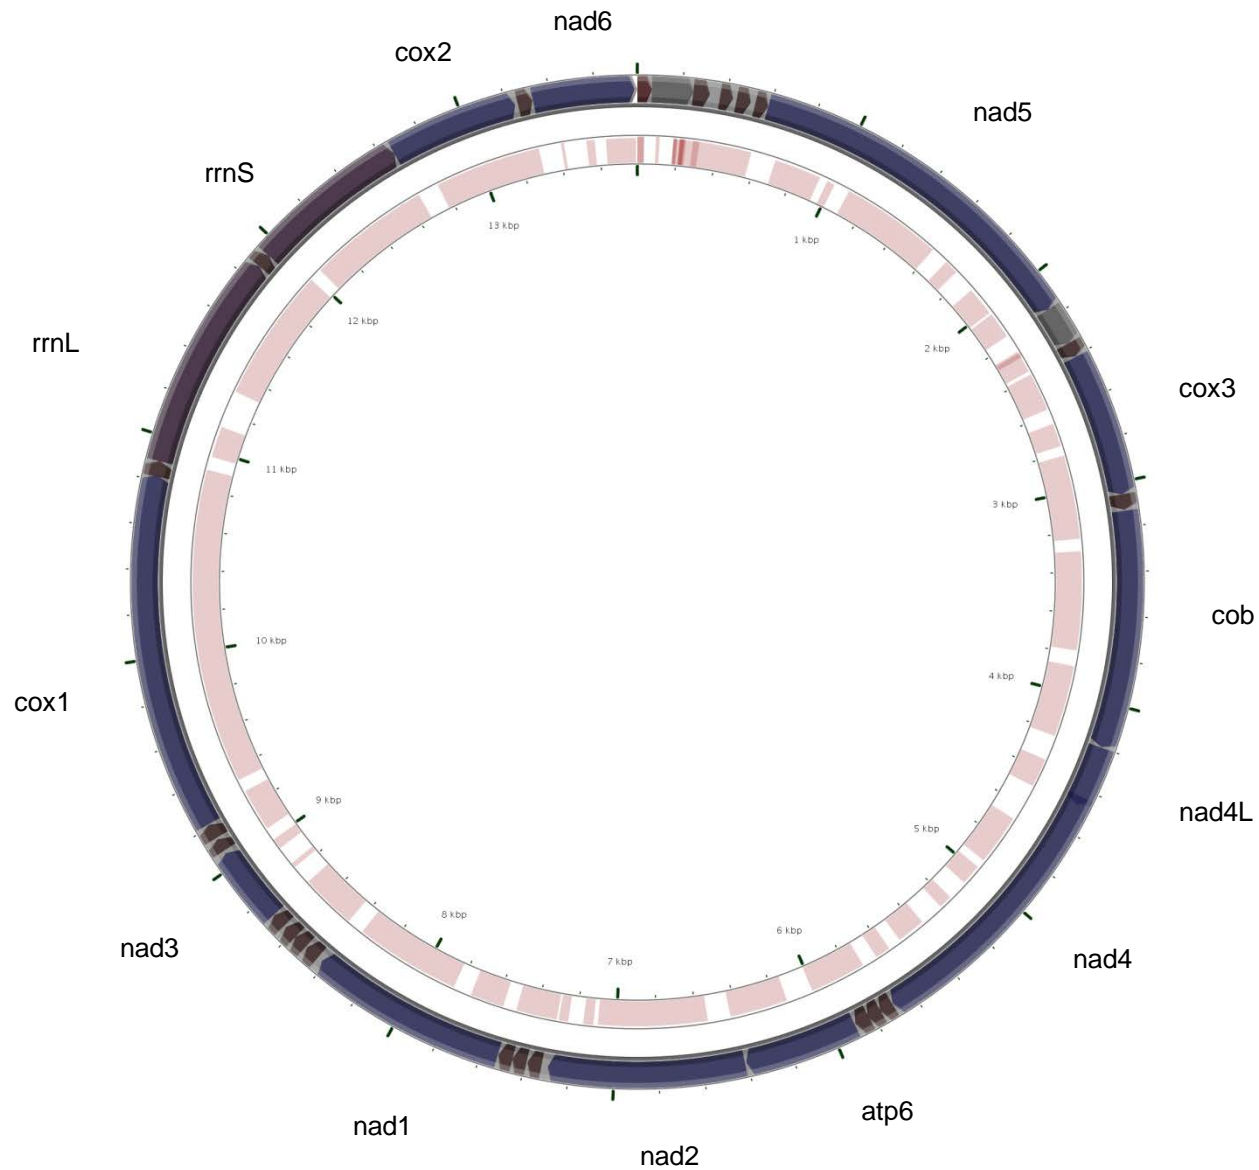

**Supplementary Figure 2.** *Echinococcus oligarthrus* mitochondrial genome. The mitochondrial scaffold (red circular map) from *E. oligarthrus* was analyzed by sequence identity against reference mitochondrial sequence (GenBank accession number AB208545) (black circular map). All CDS and rRNAs are labelled. tRNAs are shown as arrows.
