# Supplementary material for: Revisiting the Phylogenetic History of Helminths Through Genomics, the Case of the New Echinococcus oligarthrus Genome
Source: PubMed Central journal article supplement (PMC6692484; doi:10.3389/fgene.2019.00708), 2019-08-07
Supplement: DataSheet_3.pdf [file DataSheet_3.pdf]

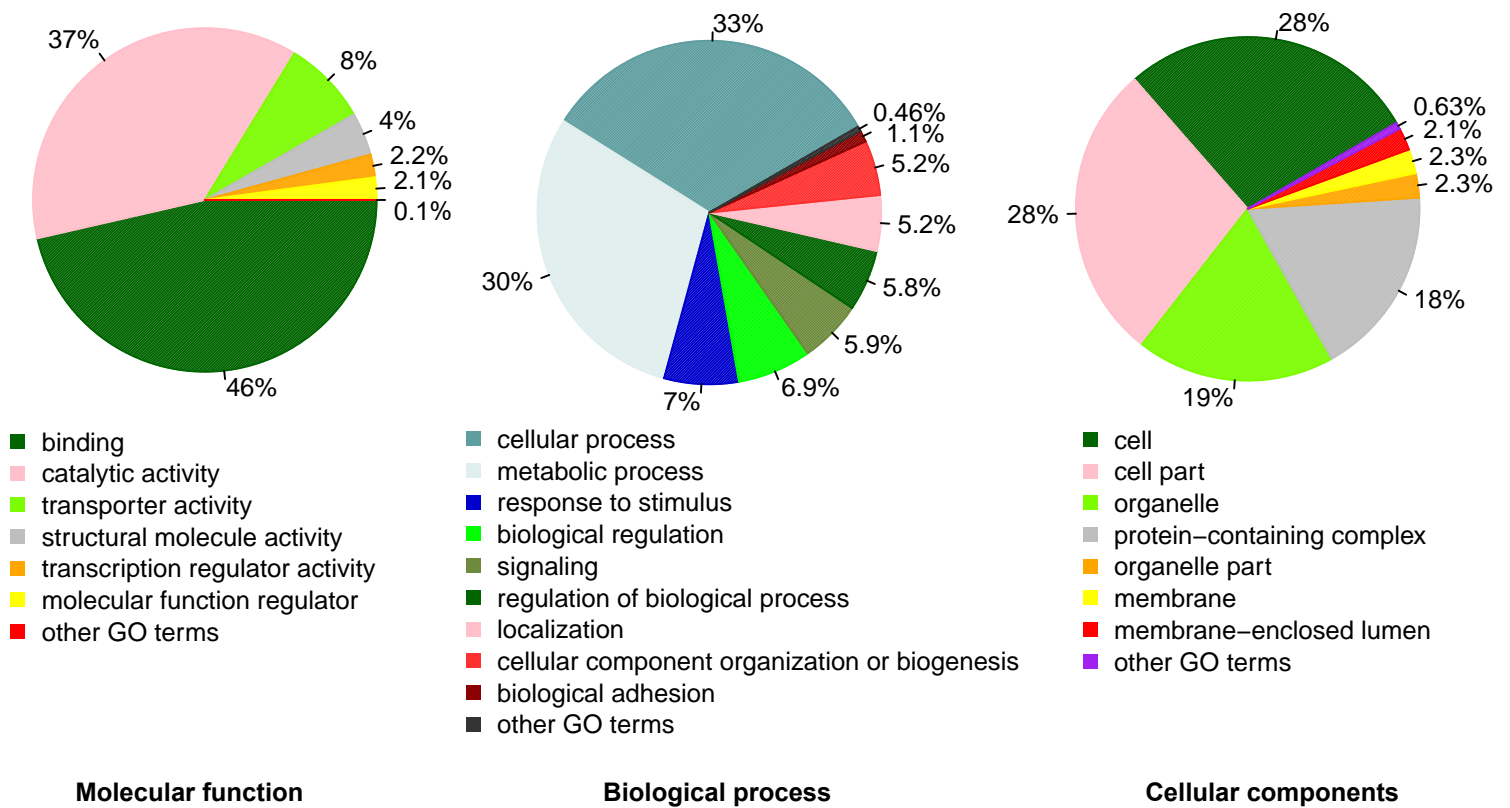

**Supplementary figure 3:** GO terms main categories of *E. oligarthrus* genes: molecular function, biological process and cellular components.
