# Supplementary material for: Revisiting the Phylogenetic History of Helminths Through Genomics, the Case of the New Echinococcus oligarthrus Genome
Source: PubMed Central journal article supplement (PMC6692484; doi:10.3389/fgene.2019.00708), 2019-08-07
Supplement: DataSheet_4.pdf [file DataSheet_4.pdf]

i

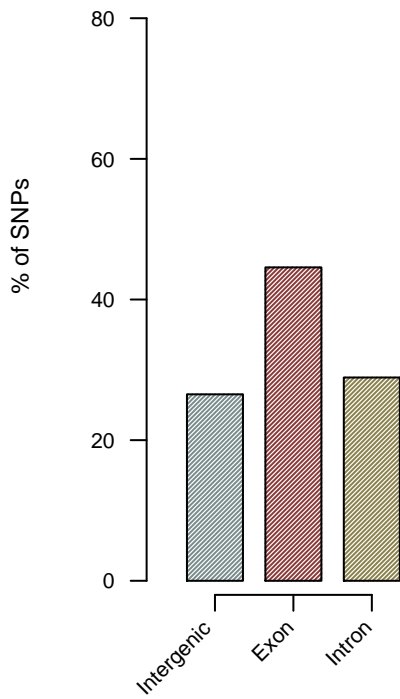

ii

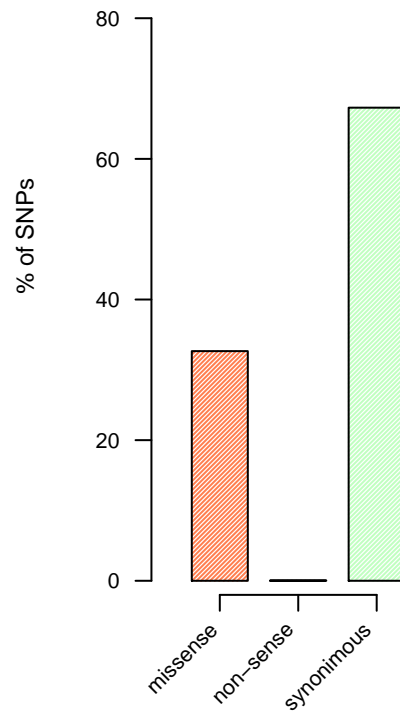

**Supplementary figure 4:** Single nucleotide polymorphisms in *Echinococcus*. (i).Percentage of SNPs distribution in genomic regions defined on the basis of gene architecture between *E. oligarthrus* and *E. multilocularis*. (ii).Type of substitution caused by SNPs in coding regions.
